# Supplementary material for: Magnitude and timing of the antiviral response determine SARS-CoV-2 replication early in infection
Source: bioRxiv or medRxiv preprint supplement (doi:10.1101/2021.01.22.21249812), 2021-01-27
Supplement: Supplementary file [file media-1.pdf]

## **Supplemental Figures and Table**

### **Supplemental Figures**

**Fig S1 (related to Fig 1) Characteristics of 30 SARS-CoV-2+ patient samples used for transcriptome analysis.**

**Fig S2 (related to Fig 2). Relationship between age, sex, and NP CXCL10 in 140 SARS-CoV-2+ patients**

**Fig S3 (related to Fig 5). Expression level of full-length ACE2 and the truncated variant dACE2 in mock-treated airway epithelial organoids following rhinovirus infection (HRV-01A).**

**Fig S4. (related to Fig 5) Time course, cell type specificity, and entry receptor expression for HRV-01A in airway epithelial organoid cultures.**

**Fig S5 (related to Fig 7). Estimated doubling time for SARS-CoV-2 +/- BX795 in low MOI infection**

### **Supplemental Table**

**Table S1 (related to Fig 3) Clinical description of longitudinal samples**

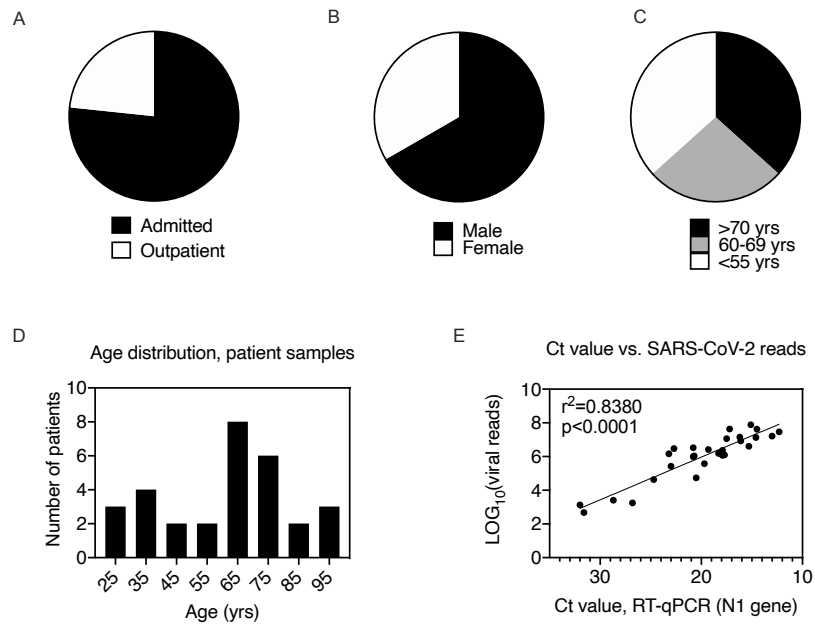

**Fig S1 (related to Fig 1). Characteristics of 30 SARS-CoV-2+ patient samples used for transcriptome analysis.**

(A-C) Patient admission status, gender, and age by category.

(D) Patient age distribution by decade. Bin center is shown on x-axis.

(E) Correlation between SARS-CoV-2 viral load measured by RT-qPCR for the viral N1 gene and number of reads mapping to SARS-CoV-2 genome by RNASeq.

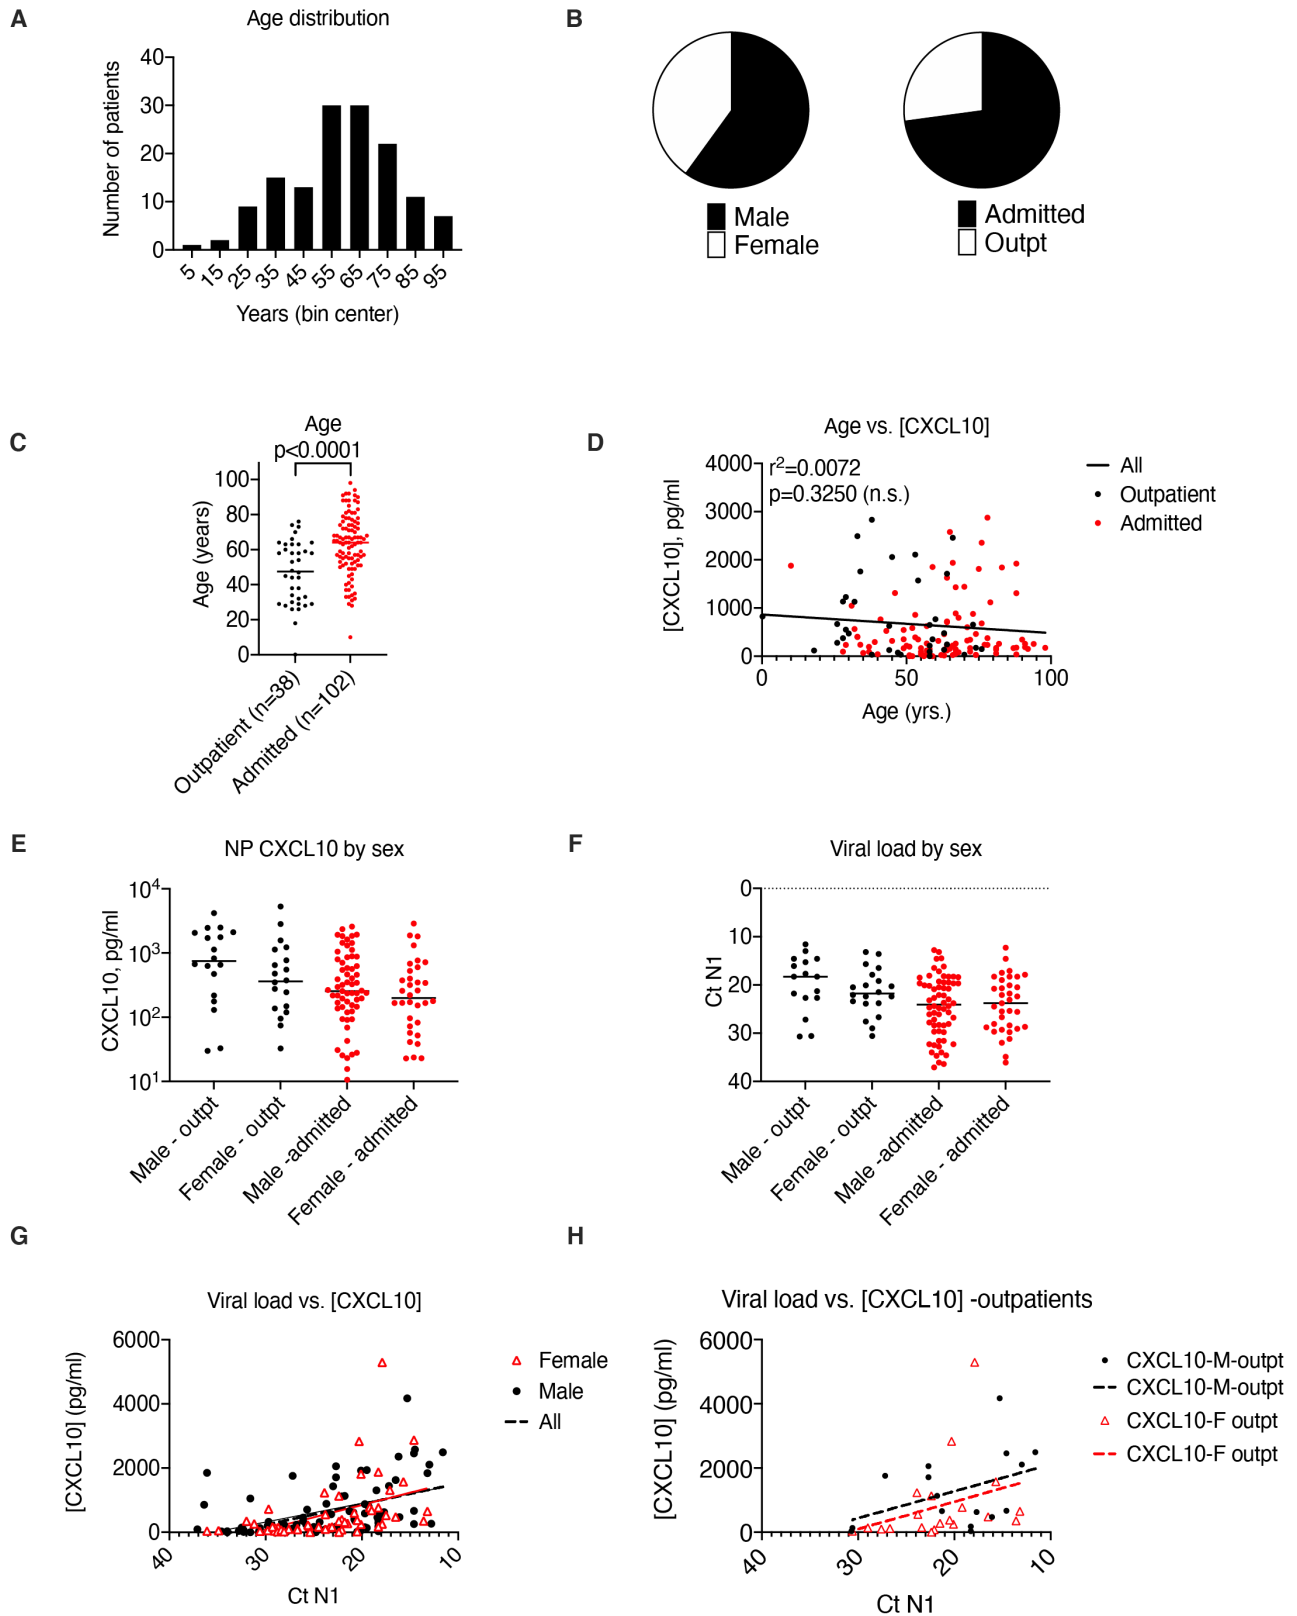

**Fig S2 (related to Fig 2). Relationship between age, sex, and NP CXCL10 in 140 SARS-CoV-2+ patients**

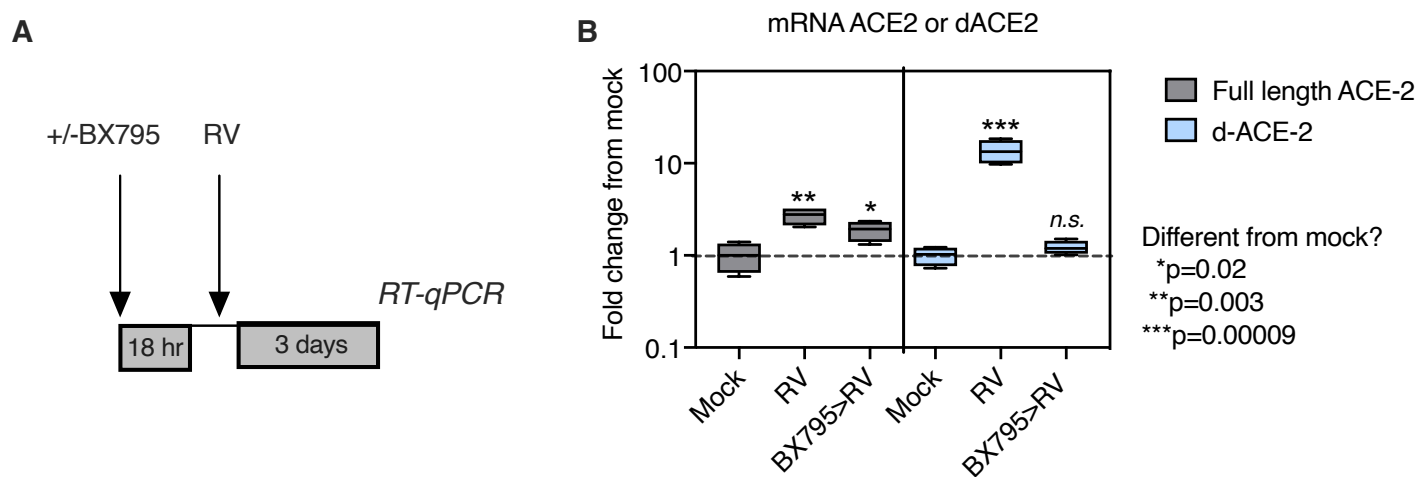

**Fig S3 (related to Fig 5). Expression level of full-length ACE2 and the truncated variant dACE2 in mock-treated airway epithelial organoids following rhinovirus infection (HRV-01A).**

- (A) Organoids were mock infected or infected with rhinovirus. Some rhinovirus-infected cultures were pre-treated for 18 hr with 6 micromolar BX795 prior to infection with rhinovirus.
- (B) RT-qPCR was performed to quantify transcripts for full length ACE-2 or dACE2. Plot shows mean and range (min to max) of 4 biological replicates per condition. Asterisks indicate significant differences from mock for each condition by the student unpaired t-test. *n.s.*= not significant

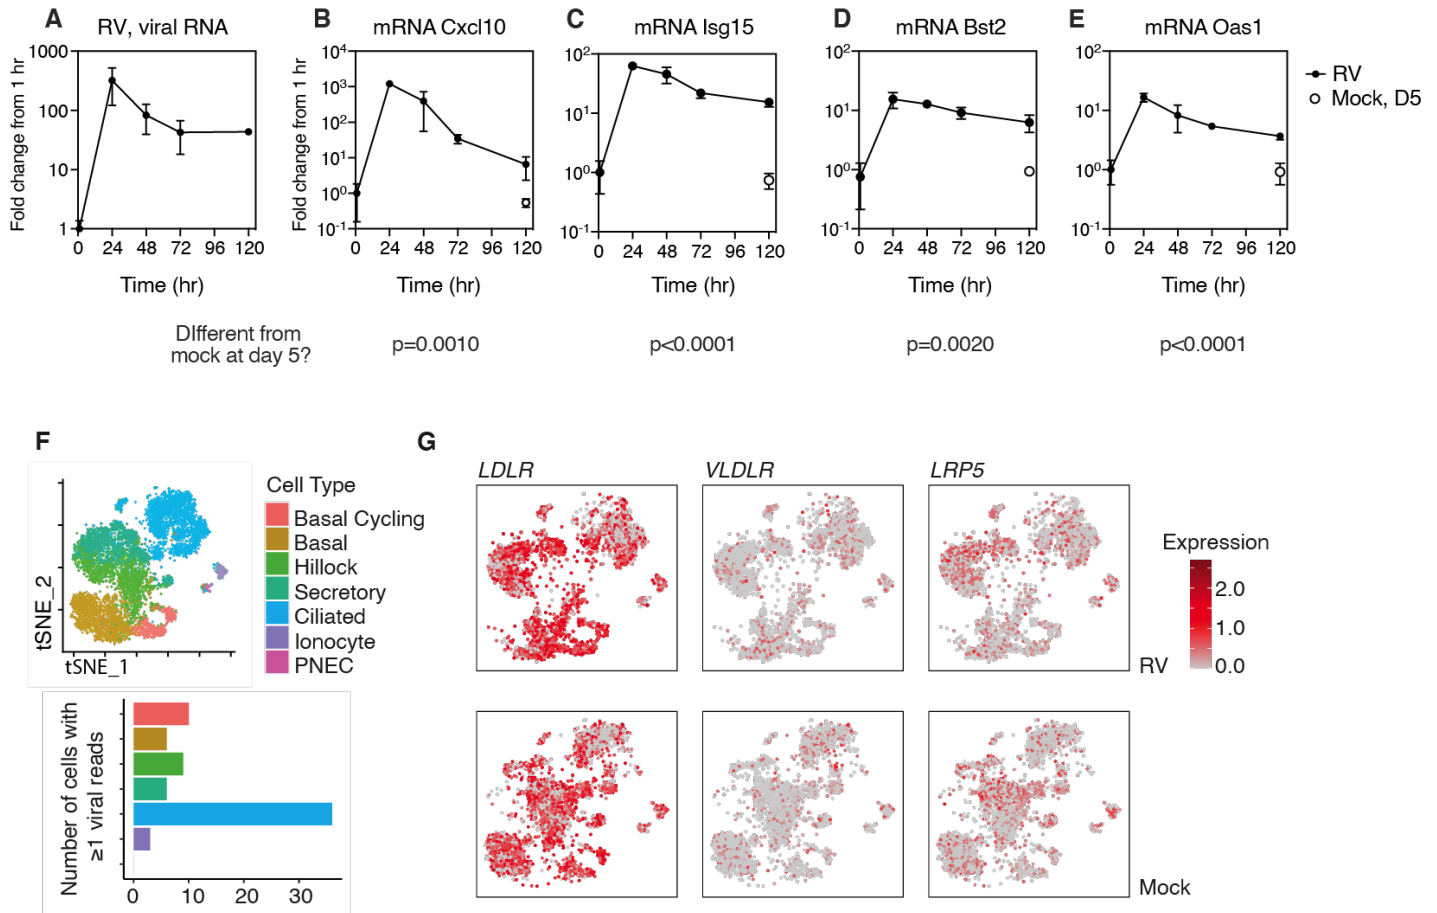

**Figure S4 (related to Fig 5). RV1A replication in differentiated primary human bronchial epithelial cultures and entry receptor expression.**

(A-E) Viral RNA level and ISG mRNA levels are graphed as fold change from ISG level at t=1 hr (post-inoculation time point). Open symbols represent ISG levels in mock-infected cultures at day 5. P-value for difference between mock and RV-infected ISG levels at day 5 are shown for each ISG (by student; unpaired t-test.). Symbols represent mean and S.D. of 3-5 biological replicates per condition.

(A) Cell type specific rhinovirus infection in human bronchial epithelial organoid cultures, 5 days post infection with rhinovirus (HRV-01A) or mock-infection. Top panel shows cell types present; bottom panel shows cell type specific distribution of 70 cells containing at least one viral read.

(B) Expression level of entry receptors for HRV-01A (LDLR, VLDLR, LRP5), in rhinovirus infected (top) or in mock-treated cultures (bottom panels.)

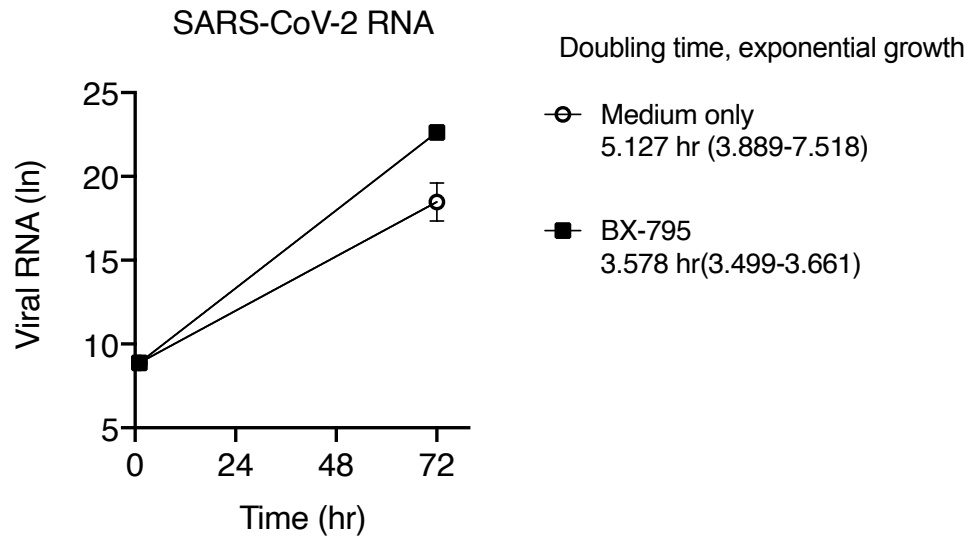

**Fig S5 (related to Fig 7). Estimated doubling time for SARS-CoV-2 +/- BX795 in low MOI infection**

| <b>Table S1 (related to Fig 3). Clinical information for longitudinal patients</b> |            |            |                       |                               |                         |                     |
|------------------------------------------------------------------------------------|------------|------------|-----------------------|-------------------------------|-------------------------|---------------------|
| <b>Viral load low to high</b>                                                      |            |            |                       | <b>First sample in series</b> |                         |                     |
| <b>Patient</b>                                                                     | <b>Age</b> | <b>Sex</b> | <b>Presentation</b>   | <b>Clinical course</b>        | <b>NP CXCL10, pg/ml</b> | <b>Ct value, N1</b> |
| L2                                                                                 | 60s        | M          | screen+, asymptomatic | no SARS-CoV-2 symptoms        | not detected            | 34.6                |
| L12                                                                                | 50s        | M          | screen+, asymptomatic | no SARS-CoV-2 symptoms        | 31                      | 31.9                |
| L39                                                                                | 70s        | F          | fever                 | moderate course, no ICU       | 66                      | 30.7                |
| L42                                                                                | 80s        | F          | fever and cough       | no oxygen requirement, no ICU | 103                     | 32.8                |
| L5                                                                                 | 80s        | M          | fever, cough, dyspnea | moderate course, no ICU       | 137                     | 29.4                |
| L44                                                                                | 90s        | F          | fever and cough       | no oxygen requirement, no ICU | 152                     | 28.7                |
| <b>Viral load high to low</b>                                                      |            |            |                       | <b>First sample in series</b> |                         |                     |
| <b>Patient</b>                                                                     | <b>Age</b> | <b>Sex</b> | <b>Presentation</b>   | <b>Clinical course</b>        | <b>NP CXCL10, pg/ml</b> | <b>Ct value, N1</b> |
| L8                                                                                 | 80s        | F          | confusion, hypoxia    | moderate course, no ICU       | 1745                    | 18.6                |
| L45                                                                                | 90s        | F          | fever, dyspnea        | moderate course, no ICU       | 452                     | 17.4                |
| L18                                                                                | 70s        | F          | dyspnea               | moderate course, no ICU       | not available           | 15.5                |
| L1                                                                                 | 60s        | M          | cough, hypoxia        | moderate course, no ICU       | 675                     | 14.8                |
| L30                                                                                | 70s        | F          | fever, dyspnea        | moderate course, no ICU       | 3109                    | 14.6                |
| L23                                                                                | 90s        | F          | screen+, asymptomatic | no oxygen requirement, no ICU | 4602                    | 12.6                |
| L41                                                                                | 70s        | M          | cough                 | no oxygen requirement, no ICU | 3270                    | 10.8                |
